# Supplementary material for: Socioenvironmental and Spatial Criteria as Tools for the Management and Conservation of Hydrozoans in Protected and Unprotected Areas
Source: MDPI journal article supplement (doi:10.3390/d15020182), 2023-01-28
Supplement: s1 [file s1]

## Supplementary Material

**Table S1.** ANOSIM results of global and pairwise comparison tests from the matrix of Jaccard's similarity for the Hydrozoa taxocene on the Espíritu Santo Archipelago.

| Test     | Diversity groups | R statistic | Significance level | Permutations |
|----------|------------------|-------------|--------------------|--------------|
| Global   | NA               | 0.748       | 0.001              | 999          |
| Pairwise | Low, Medium      | 0.657       | 0.029              | 35           |
|          | Medium, High     | 0.708       | 0.029              | 35           |
|          | Low, High        | 0.815       | 0.029              | 35           |

**Table S2.** Multiple regression results of supplementary environmental variables into the ordination of the Hydrozoa taxocene on the Espíritu Santo Archipelago.

| Data origin | Environmental factor                        | NMDS1    | NMDS2    | R2     | Pr(>r) |
|-------------|---------------------------------------------|----------|----------|--------|--------|
| In situ     | Salinity                                    | 0.31426  | 0.94934  | 0.2998 | 0.2458 |
|             | Sea surface temperature (°C)                | -0.1003  | 0.99496  | 0.0811 | 0.7236 |
| Satellite   | Chlorophyll- <i>a</i> (µg L <sup>-1</sup> ) | -0.77003 | 0.63801  | 0.1188 | 0.5985 |
|             | Dissolved oxygen (mg L <sup>-1</sup> )      | -0.74798 | -0.66372 | 0.3531 | 0.1753 |
|             | pH                                          | -0.95927 | 0.28248  | 0.3289 | 0.2022 |
|             | Salinity                                    | -0.64939 | 0.76046  | 0.1137 | 0.6386 |
|             | Sea surface temperature (°C)                | 0.80244  | 0.59673  | 0.358  | 0.1718 |

**Table S3.** Similarity analysis (SIMPER) between low, medium and high diversity groups of hydrozoans on the Espírito Santo Archipelago. Av.Sim: average similarity, Sim/SD: similarity to standard deviation ratio, Contr. %: percentage of contribution, in which (-) indicates species with no significant contribution. Bolded items denote the species that made a significant contribution.

| Species                                                             | Low    |        |          | Medium      |             |              | High       |            |              |
|---------------------------------------------------------------------|--------|--------|----------|-------------|-------------|--------------|------------|------------|--------------|
|                                                                     | Av.Sim | Sim/SD | Contri.% | Av.Sim      | Sim/SD      | Contri.%     | Av.Sim     | Sim/SD     | Contri.%     |
| <i>Abylopsis eschscholtzii</i> (Huxley, 1859)                       | -      | -      | -        | <b>18.2</b> | <b>2.93</b> | <b>42.52</b> | -          | -          | -            |
| <i>Aglaophenia pinguis</i> Fraser, 1938                             | -      | -      | -        | -           | -           | -            | 3.2        | 0.89       | 6.09         |
| <i>Aglaura hemistoma</i> Péron & Lesueur, 1810                      | -      | -      | -        | -           | -           | -            | -          | -          | -            |
| <i>Bougainvillia muscus</i> (Allman, 1863)                          | -      | -      | -        | -           | -           | -            | -          | -          | -            |
| <i>Clytia hemisphaerica</i> (Linnaeus, 1767)                        | -      | -      | -        | -           | -           | -            | -          | -          | -            |
| <i>Clytia linearis</i> (Thorneley, 1900)                            | -      | -      | -        | -           | -           | -            | <b>7.4</b> | <b>3.7</b> | <b>14.07</b> |
| <i>Clytia simplex</i> (Browne, 1902)                                | -      | -      | -        | -           | -           | -            | -          | -          | -            |
| <i>Corydendrium parasiticum</i> (Linnaeus, 1767)                    | -      | -      | -        | -           | -           | -            | -          | -          | -            |
| <i>Dynamena disticha</i> (Bosc, 1802)                               | -      | -      | -        | -           | -           | -            | 3.2        | 0.89       | 6.09         |
| <i>Dynamena quadridentata</i> (Ellis & Solander, 1786)              | -      | -      | -        | -           | -           | -            | -          | -          | -            |
| <i>Eucheilota paradoxa</i> Mayer, 1900                              | -      | -      | -        | -           | -           | -            | -          | -          | -            |
| <i>Eudoxoides mitra</i> (Huxley, 1859)                              | -      | -      | -        | -           | -           | -            | -          | -          | -            |
| <i>Halopteris violae</i> Calder, Mallinson, Collins & Hickman, 2003 | -      | -      | -        | -           | -           | -            | 1.11       | 0.41       | 2.11         |
| <i>Hydrodendron mirabile</i> (Hincks, 1866)                         | -      | -      | -        | -           | -           | -            | 4.07       | 0.86       | 7.75         |
| <i>Liriope tetraphylla</i> (Chamisso & Eysenhardt, 1821)            | -      | -      | -        | -           | -           | -            | -          | -          | -            |
| <i>Macrorhynchia philippina</i> Kirchenpauer, 1872                  | -      | -      | -        | -           | -           | -            | <b>7.4</b> | <b>3.7</b> | <b>14.07</b> |
| <i>Muggiaea atlantica</i> Cunningham, 1892                          | 9.52   | 0.58   | 29.41    | -           | -           | -            | 3.2        | 0.89       | 6.09         |
| <i>Nanomia bijuga</i> (Delle Chiaje, 1844)                          | 13.33  | 0.58   | 41.18    | 2.22        | 0.41        | 5.19         | -          | -          | -            |
| <i>Obelia dichotoma</i> (Linnaeus, 1758)                            | -      | -      | -        | -           | -           | -            | <b>7.4</b> | <b>3.7</b> | <b>14.07</b> |
| <i>Pennaria disticha</i> Goldfuss, 1820                             | -      | -      | -        | -           | -           | -            | 4.07       | 0.86       | 7.75         |
| <i>Plumularia floridana</i> Nutting, 1900                           | -      | -      | -        | -           | -           | -            | 3.2        | 0.89       | 6.09         |
| <i>Rhopalonema velatum</i> Gegenbaur, 1857                          | 9.52   | 0.58   | 29.41    | -           | -           | -            | -          | -          | -            |
| <i>Solmundella bitentaculata</i> (Quoy & Gaimard, 1833)             | -      | -      | -        | -           | -           | -            | -          | -          | -            |
| <i>Stauridiosarsia ophiogaster</i> (Haeckel, 1879)                  | -      | -      | -        | <b>18.2</b> | <b>2.93</b> | <b>42.52</b> | -          | -          | -            |
| <i>Ventromma halecioides</i> (Alder, 1859)                          | -      | -      | -        | -           | -           | -            | 3.2        | 0.89       | 6.09         |

**Table S4.** Similarity analysis (SIMPER) with pairwise comparison within diversity groups of hydrozoans on the Espíritu Santo Archipelago. Av.Diss: average dissimilarity, Diss/SD: dissimilarity to standard deviation ratio, Contr. %: percentage of contribution and (-) for species with no significant contribution. Bolded items denote the species that made a significant contribution.

| Species                                                             | Low x Medium |             |              | Low x High  |             |             | Medium x High |             |             |
|---------------------------------------------------------------------|--------------|-------------|--------------|-------------|-------------|-------------|---------------|-------------|-------------|
|                                                                     | Av.Diss      | Diss/SD     | Contr.%      | Av.Diss     | Diss/SD     | Contr.%     | Av.Diss       | Diss/SD     | Contr.%     |
| <i>Abylopsis eschscholtzii</i> (Huxley, 1859)                       | <b>13.82</b> | <b>1.89</b> | <b>16.49</b> | 1.21        | 0.55        | 1.4         | <b>4.41</b>   | <b>1.41</b> | <b>5.45</b> |
| <i>Aglaophenia pinguis</i> Fraser, 1938                             | 2.63         | 0.55        | 3.14         | <b>4.44</b> | <b>1.36</b> | <b>5.11</b> | <b>3.26</b>   | <b>1.1</b>  | <b>4.03</b> |
| <i>Aglaura hemistoma</i> Péron & Lesueur, 1810                      | 3.67         | 0.63        | 4.38         | 1.99        | 0.64        | 2.29        | -             | -           | -           |
| <i>Bougainvillia muscus</i> (Allman, 1863)                          | 2.63         | 0.55        | 3.14         | 2.27        | 0.95        | 2.61        | 2.3           | 0.92        | 2.85        |
| <i>Clytia hemisphaerica</i> (Linnaeus, 1767)                        | -            | -           | -            | 2.27        | 0.95        | 2.61        | 1.99          | 0.95        | 2.47        |
| <i>Clytia linearis</i> (Thorneley, 1900)                            | 2.63         | 0.55        | 3.14         | <b>6.61</b> | <b>2.88</b> | <b>7.6</b>  | <b>4.21</b>   | <b>1.38</b> | <b>5.21</b> |
| <i>Clytia simplex</i> (Browne, 1902)                                | 3.36         | 0.54        | 4.01         | -           | -           | -           | -             | -           | -           |
| <i>Corydendrium parasiticum</i> (Linnaeus, 1767)                    | -            | -           | -            | 2.17        | 0.55        | 2.49        | 1.73          | 0.54        | 2.15        |
| <i>Dynamena disticha</i> (Bosc, 1802)                               | -            | -           | -            | <b>4.44</b> | <b>1.36</b> | <b>5.11</b> | <b>3.73</b>   | <b>1.39</b> | <b>4.62</b> |
| <i>Dynamena quadridentata</i> (Ellis & Solander, 1786)              | -            | -           | -            | 2.17        | 0.55        | 2.49        | 1.73          | 0.54        | 2.15        |
| <i>Eucoilota paradoxica</i> Mayer, 1900                             | -            | -           | -            | 2.27        | 0.95        | 2.61        | 2.23          | 0.95        | 2.76        |
| <i>Eudoxoides mitra</i> (Huxley, 1859)                              | -            | -           | -            | -           | -           | -           | 1.62          | 0.73        | 2           |
| <i>Halopteris violae</i> Calder, Mallinson, Collins & Hickman, 2003 | -            | -           | -            | 3.23        | 0.85        | 3.71        | 2.67          | 0.86        | 3.31        |
| <i>Hydrodendron mirabile</i> (Hincks, 1866)                         | -            | -           | -            | <b>5.4</b>  | <b>1.41</b> | <b>6.21</b> | <b>4.41</b>   | <b>1.41</b> | <b>5.45</b> |
| <i>Liriope tetraphylla</i> (Chamisso & Eysenhardt, 1821)            | 4.18         | 0.62        | 4.99         | 2.92        | 0.88        | 3.36        | 1.99          | 0.95        | 2.47        |
| <i>Macrorhynchia philippina</i> Kirchenpauer, 1872                  | -            | -           | -            | <b>6.61</b> | <b>2.88</b> | <b>7.6</b>  | <b>5.46</b>   | <b>2.91</b> | <b>6.76</b> |
| <i>Muggiaea atlantica</i> Cunningham, 1892                          | <b>7.37</b>  | <b>1.02</b> | <b>8.8</b>   | 2.99        | 0.76        | 3.43        | <b>3.3</b>    | <b>1.11</b> | <b>4.09</b> |
| <i>Nanomia bijuga</i> (Delle Chiaje, 1844)                          | 7.65         | 0.75        | 9.13         | 3.69        | 0.88        | 4.25        | 2.61          | 0.92        | 3.23        |
| <i>Obelia dichotoma</i> (Linnaeus, 1758)                            | -            | -           | -            | <b>6.61</b> | <b>2.88</b> | <b>7.6</b>  | <b>5.46</b>   | <b>2.91</b> | <b>6.76</b> |
| <i>Pennaria disticha</i> Goldfuss, 1820                             | -            | -           | -            | <b>5.4</b>  | <b>1.41</b> | <b>6.21</b> | <b>4.41</b>   | <b>1.41</b> | <b>5.45</b> |
| <i>Plumularia floridana</i> Nutting, 1900                           | 2.63         | 0.55        | 3.14         | <b>4.44</b> | <b>1.36</b> | <b>5.11</b> | <b>3.26</b>   | <b>1.1</b>  | <b>4.03</b> |
| <i>Rhopalonema velatum</i> Gegenbaur, 1857                          | 6.79         | 0.87        | 8.11         | 3.49        | 0.92        | 4.01        | 2.61          | 0.92        | 3.23        |
| <i>Solmundella bitentaculata</i> (Quoy & Gaimard, 1833)             | -            | -           | -            | -           | -           | -           | 1.69          | 0.73        | 2.1         |
| <i>Stauridiosarsia ophiogaster</i> (Haeckel, 1879)                  | <b>13.82</b> | <b>1.89</b> | <b>16.49</b> | -           | -           | -           | <b>5.46</b>   | <b>2.91</b> | <b>6.76</b> |
| <i>Ventromma halecioides</i> (Alder, 1859)                          | 4.63         | 0.93        | 5.52         | <b>4.44</b> | <b>1.36</b> | <b>5.11</b> | 2.83          | 0.9         | 3.5         |
